# Supplementary material for: Exhaled breath of children swimmers conveniently collected in Teflon bags and used for trihalomethane determination by SPME-GC-MS
Source: Royal Society of Chemistry journal article supplement (doi:10.1039/d4ay01499e), 2024-01-01
Supplement: d4ay01499e1.pdf [file d4ay01499e1.pdf]

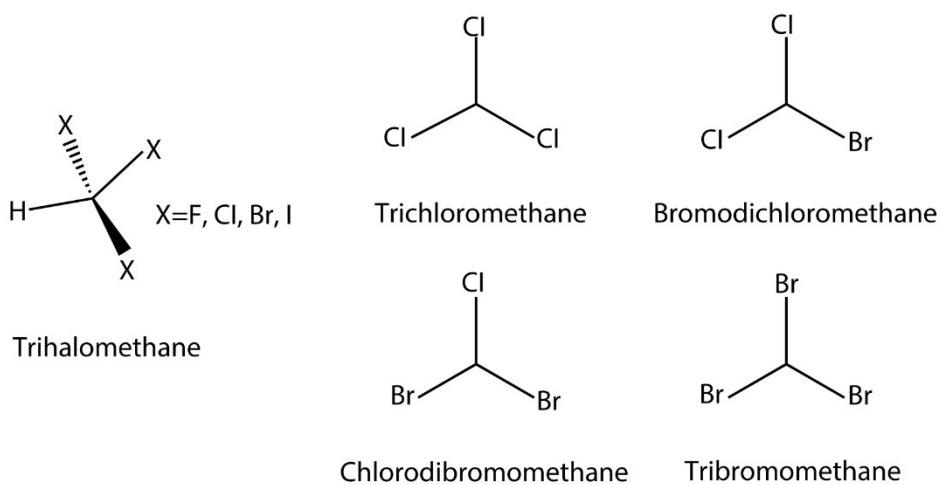

**Figure S1** Structure of the four THMs

**Table S1** Basic information of 4 THMs

| Compound             | Abbr | CASN     | Formula                  | Molecular Weight |
|----------------------|------|----------|--------------------------|------------------|
| Trichloromethane     | TCM  | 67-66-3  | $\text{CHCl}_3$          | 119.38           |
| Bromodichloromethane | BDCM | 75-27-4  | $\text{CHBrCl}_2$        | 163.829          |
| Chlorodibromomethane | DBCM | 124-48-1 | $\text{CHBr}_2\text{Cl}$ | 208.28           |
| Tribromomethane      | TBM  | 75-25-2  | $\text{CHBr}_3$          | 252.731          |

**Table S2** The mass spectrum parameters of 4 THMs

| THMs | Quantitative | Qualitative |
|------|--------------|-------------|
|      | Ions (m/z)   | Ions (m/z)  |
| TCM  | 83           | 85, 47      |
| BDCM | 83           | 85, 129     |
| DBCM | 129          | 127         |
| TBM  | 173          | 171, 91     |

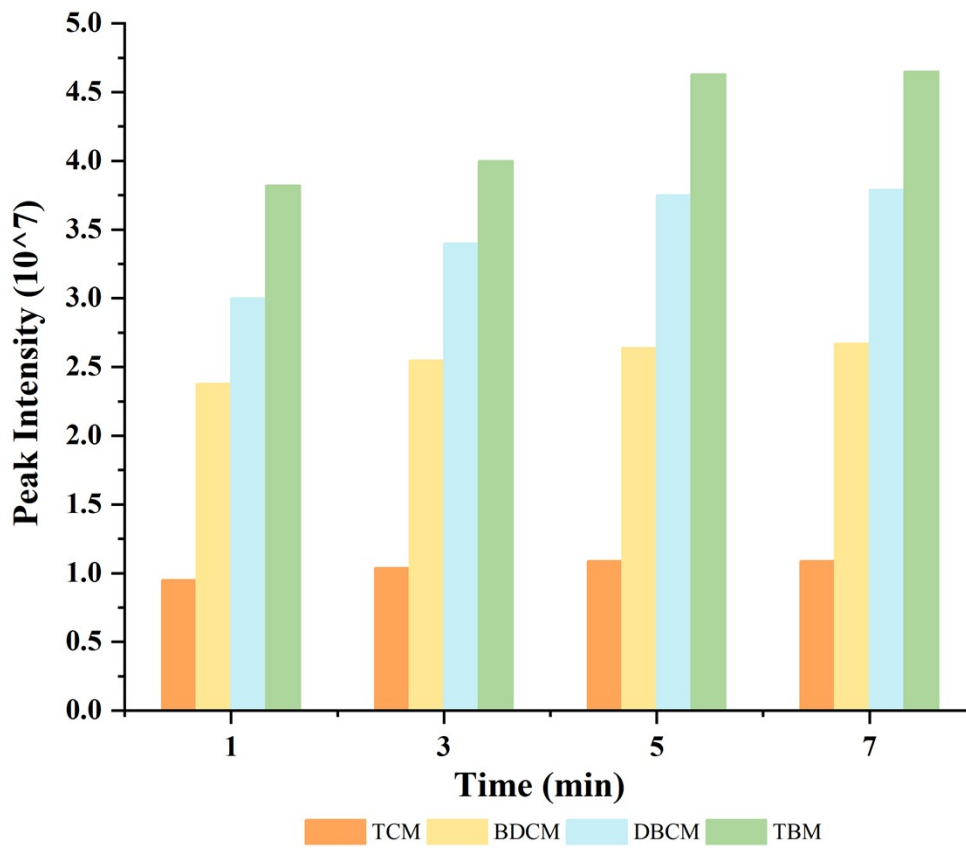

**Figure S2** Comparison of peak area at different desorption times

**Table S3** The concentration of THMs in the air of the swimming pool ( ng L<sup>-1</sup>)

|                    | TCM    | BDCM  | DBCM | TBM  |
|--------------------|--------|-------|------|------|
| shallow water-low  | 158.08 | 12.51 | 4.84 | 2.08 |
| deep water-low     | 218.87 | 20.49 | 8.45 | 2.41 |
| Shallow water-high | 75.44  | 8.54  | 4.17 | 2.06 |
| deep water-high    | 154.75 | 17.32 | 6.67 | 2.10 |

**Table S4** Basic information for children swimmers (n=11)

| Variable                | Mean±SD or n(%) |
|-------------------------|-----------------|
| Age, year               | 10.55±2.46      |
| Sex                     |                 |
| Male                    | 6(54.5)         |
| Female                  | 5(45.5)         |
| BMI, kg/m <sup>2</sup>  | 16.59±2.09      |
| Swimming duration, year | 4.23±1.69       |
| Monthly swim times      | 15.32±9.19      |

**Table S5** Detection of THMs concentration in children swimmers' exhaled breath ( ng L<sup>-1</sup>)

|               | Minimum | P <sub>25</sub> | Median | P <sub>75</sub> | Maximum |
|---------------|---------|-----------------|--------|-----------------|---------|
| Pre-swimming  |         |                 |        |                 |         |
| TCM           | 9.40    | 9.44            | 13.89  | 18.57           | 21.38   |
| BDCM          | 2.47    | 2.48            | 2.80   | 3.30            | 3.51    |
| DBCM          | 1.37    | 1.46            | 1.60   | 1.89            | 2.08    |
| TBM           | 1.60    | 1.62            | 1.63   | 1.73            | 1.94    |
| TTHMs         | 14.86   | 14.99           | 21.21  | 25.66           | 28.64   |
| Post-swimming |         |                 |        |                 |         |
| TCM           | 73.20   | 83.21           | 105.48 | 130.86          | 138.36  |
| BDCM          | 7.95    | 9.51            | 10.76  | 12.54           | 14.88   |
| DBCM          | 3.48    | 3.81            | 4.47   | 5.11            | 5.49    |
| TBM           | 1.94    | 2.05            | 2.16   | 2.31            | 2.48    |
| TTHMs         | 87.86   | 104.14          | 121.01 | 150.52          | 158.13  |

**Table S6** Children swimmers' questionnaire information and THMs concentration in exhaled breath (n=11).

| Coding | Sex | Age | High | Weight | Swimming<br>year | Swimming<br>time | TCM   | Pre-swimming |      |      | Post-swimming |       |      |      |
|--------|-----|-----|------|--------|------------------|------------------|-------|--------------|------|------|---------------|-------|------|------|
|        |     |     |      |        |                  |                  |       | BDCM         | DBCM | TBM  | TCM           | BDCM  | DBCM | TBM  |
| 1      | 2   | 12  | 163  | 40     | 3.5              | 15-20            | 10.13 | 2.59         | 1.60 | 1.63 | 95.33         | 10.41 | 4.47 | 2.19 |
| 2      | 2   | 14  | 167  | 46     | 5                | 25               | 18.57 | 3.25         | 1.87 | 1.71 | 73.20         | 8.64  | 3.96 | 2.06 |
| 3      | 2   | 15  | 168  | 51     | 8                | 30               | 21.38 | 3.51         | 2.02 | 1.73 | 88.35         | 9.51  | 4.12 | 2.16 |
| 4      | 1   | 11  | 145  | 38     | 2                | 3                | 15.75 | 2.80         | 1.57 | 1.61 | 105.48        | 9.81  | 3.76 | 1.97 |
| 5      | 1   | 9   | 126  | 24     | 4                | 24               | 19.62 | 3.23         | 1.73 | 1.68 | 83.21         | 7.95  | 3.48 | 1.94 |
| 6      | 1   | 7   | 118  | 29     | 4                | 24               | 9.40  | 2.48         | 1.48 | 1.63 | 138.36        | 12.54 | 5.02 | 2.21 |
| 7      | 1   | 8   | 130  | 24     | 3                | 8                | 9.44  | 2.47         | 1.45 | 1.62 | 130.86        | 12.11 | 5.25 | 2.31 |
| 8      | 2   | 10  | 130  | 27     | 5                | 12               | 9.42  | 2.47         | 1.37 | 1.60 | 123.60        | 10.76 | 3.81 | 2.05 |
| 9      | 1   | 10  | 145  | 30     | 5                | 10               | 18.54 | 3.49         | 1.89 | 1.74 | 133.38        | 13.68 | 5.49 | 2.33 |
| 10     | 1   | 12  | 160  | 40     | 2                | 10               | 10.31 | 2.57         | 1.46 | 1.62 | 82.77         | 14.88 | 4.50 | 2.07 |
| 11     | 2   | 12  | 155  | 45     | 5                | 5                | 13.89 | 3.30         | 2.08 | 1.94 | 125.43        | 11.18 | 5.11 | 2.48 |
| 12     | 2   | 7   | 122  | 22     | 3                | 1                | 0.76  | 1.80         | 1.18 | 1.56 | 103.84        | 10.91 | 4.25 | 2.04 |
| 13     | 1   | 7   | 110  | 28     | 2                | 15               | 8.29  | 2.34         | 1.35 | 1.57 | 50.83         | 6.42  | 2.29 | 1.70 |
| 14     | 1   | 13  | 158  | 54     | 5                | 3                | 5.12  | 2.08         | 1.26 | 1.57 | 24.44         | 3.67  | 1.58 | 1.58 |
| 15     | 1   | 13  | 149  | 40     | 3                | 3-4              | 4.53  | 2.18         | 1.29 | 1.58 | 13.89         | 5.48  | 4.68 | 2.66 |
| 16     | 1   | 9   | 130  | 26     | 1.5              | 2                | 4.89  | 2.15         | 1.27 | 1.54 | 8.47          | 4.70  | 4.59 | 2.44 |
